# Supplementary material for: Characteristic immunophenotype and gene co-mutational status orchestrate to optimize the prognosis of CEBPA mutant acute myeloid leukemia
Source: PubMed Central journal article supplement (PMC10162953; doi:10.1038/s41408-023-00838-2), 2023-05-05
Supplement: 41408_2023_838_MOESM1_ESM.pdf [file 41408_2023_838_MOESM1_ESM.pdf]

1 **Characteristic immunophenotype and gene co-mutational**  
2 **status orchestrate to optimize the prognosis of *CEBPA* mutant**  
3 **acute myeloid leukemia**

4  
5 **Supplementary Information**

6  
7 **Supplementary Methods**

8 **Patients**

9 In this study, we analyzed 293 consecutive *de novo* AML patients with *CEBPA*  
10 mutations. Most of the individuals (n= 228, 77.8%) were enrolled in prospective  
11 studies, involving RJ-AML 2014 Trial (n= 73, ChiCTR-OPC-15006085) (1), RJ-  
12 AML 2016 Trial (n= 120, ChiCTR-OIC-16007764) and RJ-OLD AML 2016 Trial  
13 (n= 35, ChiCTR-OIN-16008955). The remaining 65 patients were recruited to  
14 Ruijin registry and biorepository. Among all the patients, targeted NGS were  
15 performed in 124 individuals. The amino acid changes in the *CEBPA* protein  
16 structure were visualized using the ProteinPaint  
17 (<https://pecan.stjude.org/proteinpaint>). Detailed treatment procedure was  
18 depicted in Supplementary Figure 5. For our results validation, data from  
19 BeatAML cohort was downregulated from BeatAML 2.0 project's data repository  
20 (<https://biodev.github.io/BeatAML2/>).

21 This study was approved by the Ethics Committee of Ruijin Hospital Affiliated  
22 to Shanghai Jiao Tong University School of Medicine. Informed consent for both

23 treatment and cryopreservation of bone marrow and peripheral blood samples  
24 was obtained in accordance with the Declaration of Helsinki from all participants.

25

## 26 **Materials and sequencing analysis**

27 Materials investigated in this study were obtained at the time of diagnosis. The  
28 genomic DNA (isolated with DSP DNA Mini Kit, QIAGEN) and total RNA  
29 (isolated with TRIzol, Life Technologies) was extracted from mononuclear cells  
30 of patients with  $\geq 20\%$  blasts in bone marrow or peripheral blood according to  
31 the manufacturer's instructions.

32 Profiling of mutations was performed by hybrid capture-based targeted exome  
33 sequencing (TES) covering 100 genes frequently mutated in acute leukemia.  
34 TES libraries were prepared using the NadPrep EZ DNA Library Preparation  
35 Kit (Nanodigmbio), and sequencing was performed on a NextSeq 550 platform  
36 (Illumina). Paired-end reads were aligned to the hg19 reference genome.  
37 Variant calling between pairs was performed with GATK4 Mutect2, VarDict  
38 (v1.5.8), and MuTect (v1.1.7). All the mutations were annotated by snpEff (v4.2)  
39 and ANNOVAR. Homemade pipelines were used to filter SNVs and indels  
40 detected by the aforementioned software, according to the analysis standards  
41 as described previously (2). R package ComplexHeatmap (v2.15.1) was used  
42 for depicting the distribution of co-mutations.

43 RNA sequencing (RNA-Seq) libraries were constructed using the KAPA RNA  
44 HyperPrep kit (Roche) and sequenced on the NovaSeq 6000 platform (Illumina)

45 according to the manufacturer's instructions. SeqCap EZ Human Exome v3.0  
46 kit (Roche) was used for the preparation of whole exome sequencing (WES)  
47 libraries following by sequencing on the NovaSeq 6000 platform (Illumina). The  
48 raw RNA-seq reads were mapping to human genome reference (hg19) with  
49 STAR, then featureCounts (v2.0.1) was used for the calculation of counts matrix.  
50 All gene expression data from the RNA-seq experiment were normalized using  
51 "varianceStabilizingTransformation" function from R package DESeq2  
52 (v1.34.0), which was used as gene expression matrix for following analysis.  
53 Unsupervised clustering and CD7-supervised clustering of all 122 sample was  
54 conducted in the R package cola. Differential Gene Expression analysis was  
55 done by R package limma (v3.50.3), following the official standard workflow.  
56 The enrichment of both downregulated and upregulated genes between the  
57 groups was conducted by R package clusterProfiler (v4.2.2). The Oncoplots  
58 were drawn using R package ComplexHeatmap (v2.13.2). A total of 17385  
59 protein-coding genes were used to analyze differential expression between the  
60 CD7-positive group and CD7-negative group using the limma package (v.3.50.3).  
61 Gene Set Enrichment Analysis (GSEA) was performed using the "gsePathway"  
62 function in the R package ReactomePA (v.1.38.0).

63

## 64 **Flow Cytometry**

65 Lymphocytes in the samples were gated according to the antigen profile, scatter  
66 properties and bright positivity for CD45 (Krome Orange-conjugated, Beckman

67 Coulter, #B36294). Data were only accepted without lymphocyte contamination.  
68 CD7 (APC–Alexa Fluor 750-conjugated, Beckman Coulter, #B16892) was  
69 regarded as positive when at least 20% of gated cells were more fluorescent  
70 than the isotype-matched negative control. Multiparameter flow cytometry  
71 (MFC) based on a 10-color immunophenotyping panel of monoclonal  
72 antibodies against specific cell surface markers were used for distinguishing  
73 normal cells from leukemic blasts, identifying the leukemia-associated aberrant  
74 immunophenotype (LAIP) as previously described (3).

75

#### 76 **Statistical analysis**

77 For clinical variables analysis,  $\chi^2$ - or a 2-side Fisher's exact test was used for  
78 categorical variables comparison while the nonparametric Mann-Whitney U test  
79 was applied for continuous variables.

80 For survival analysis, overall survival (OS) defined as the time from diagnosis  
81 to death due to any cause, event-free survival (EFS) defined as the time from  
82 diagnosis to the first treatment failure, including induction failure, relapse in any  
83 site, death of any cause or development of a second tumor, and disease-free  
84 survival (DFS) defined as the time from end of induction for patients who  
85 achieved complete remission (CR) until relapse or death, was estimated using  
86 the Kaplan-Meier method and compared using the log-rank test, respectively.

87 For multivariate regression analysis of clinical prognostic factors, Cox-  
88 proportional hazard regression models were used. Net reclassification

89 improvement (NRI) calculation was performed as previously described (4)  
90 using the nricens package (version 1.6). All statistical analyses were  
91 performed with the SPSS software package, version 26 (SPSS, Chiago, IL)  
92 and R version 3.5.3 (<https://www.R-project.org/>). *P*-values < 0.05 were  
93 considered significant throughout the manuscript.

94

95

96

97

98

99

100

101

102

103

104

105

106

107

108

109

110

111 **Supplementary Figures and Tables**

Supplementary Figure 1

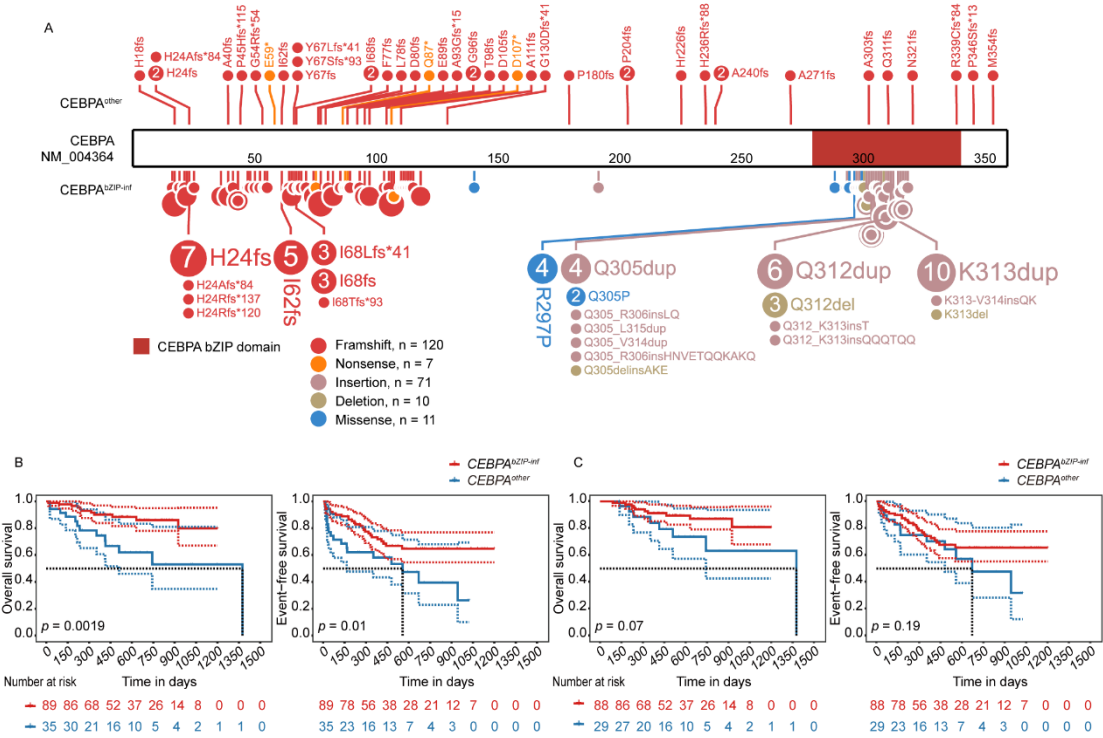

112

113 **Supplementary Figure 1. The protein schematic diagram and survival**  
 114 **curves of *CEBPA*<sup>mut</sup> AML patients in our cohort.**

115 (A) The distribution of *CEBPA* mutations within the cohort of 124 *CEBPA*<sup>mut</sup>  
 116 AML patients having available targeted sequencing data. The mutation loci of  
 117 *CEBPA*<sup>bZIP-inf</sup> and *CEBPA*<sup>other</sup> was depicted below and above the protein  
 118 schematic diagram, respectively.

119 (B) Kaplan-Meier curves for OS and EFS within the cohort of 124 *CEBPA*<sup>mut</sup>  
 120 AML patients.

121 (C) Kaplan-Meier survival curves for OS and EFS within the cohort of 117  
 122 *CEBPA*<sup>mut</sup> AML patients who achieved CR during induction therapy.

123

Supplementary Figure 2

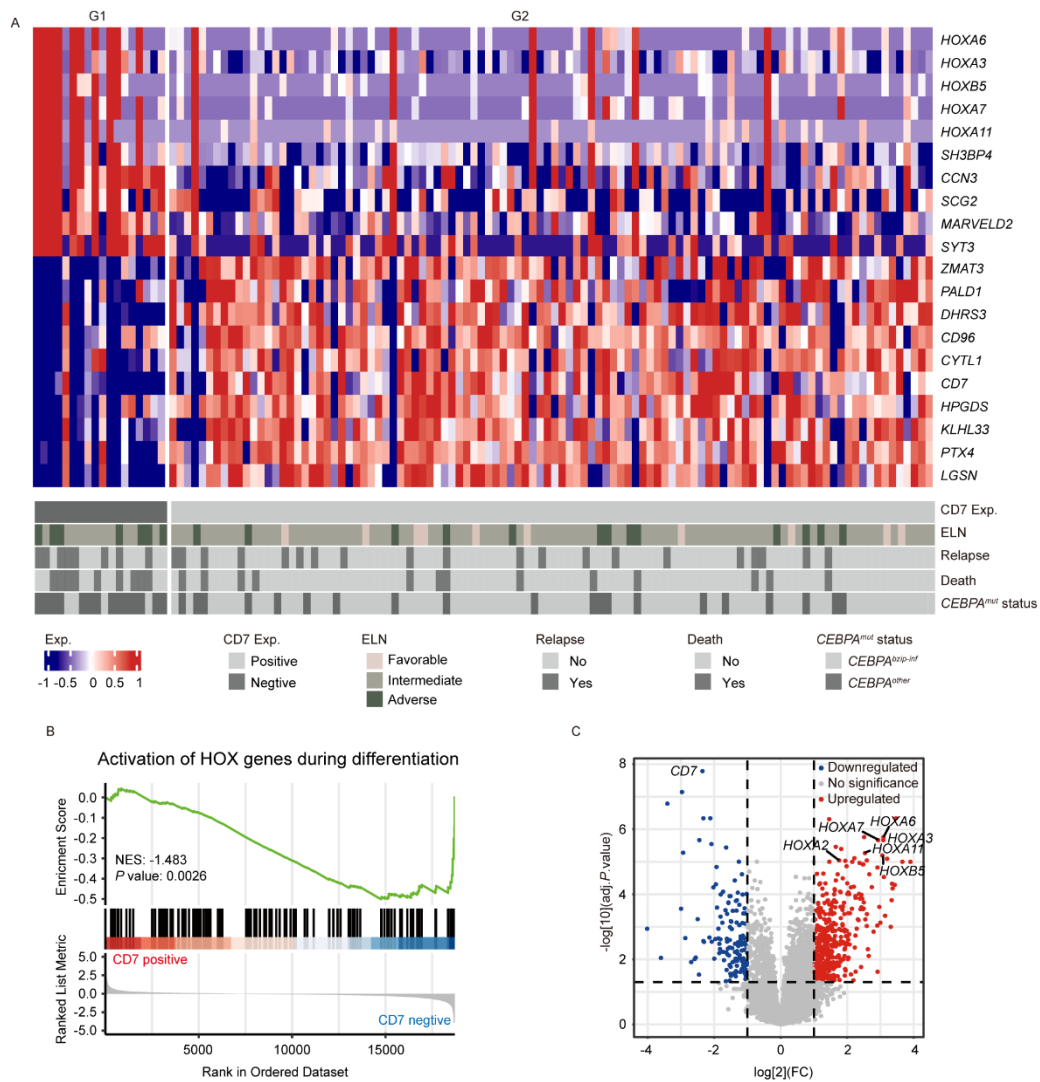

124

125 **Supplementary Figure 2. CD7 positive cases showed distinct gene**  
 126 **expression patterns compared with CD7 negative cases.**

127 (A) Top ten DEGs identified as up- (red) or down- (blue) regulated were  
 128 ranked by the the magnitude of expression value change.

129 (B) Gene Set Enrichment Analysis for the DEGs derived from CD7-positive  
 130 cases compared to CD7-negative cases. NES, nominal enrichment score.

131 (C) Volcano plot showing DEGs according to the two distinct subcohorts  
 132 clustered by CD7 -positive and -negative expression.

133

Supplementary Figure 3

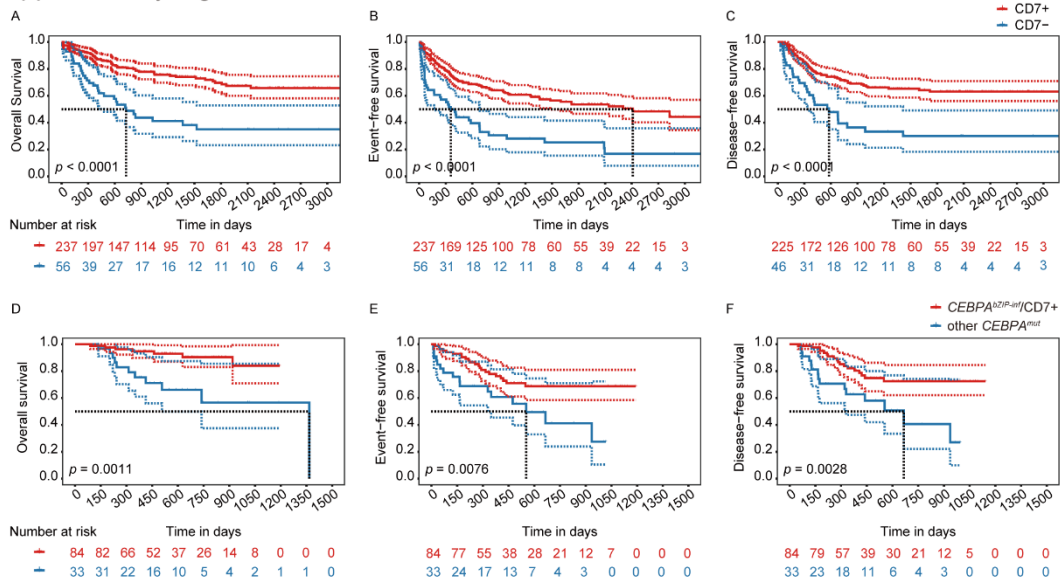

134

135 **Supplementary Figure 3. Kaplan-Meier curves for the survival according**  
 136 **to CD7 expression and CEBPA mutation status.**

137 In the cohort of 293 *CEBPA*<sup>mut</sup> AML patients, Kaplan-Meier curves were plotted  
 138 for OS (A), EFS (B) and DFS (C) according to CD7 expression.

139 In the cohort of 117 CR-achieved *CEBPA*<sup>mut</sup> AML patients, Kaplan-Meier curves  
 140 were plotted for OS (D), EFS (E) and DFS (F) according to both CD7 expression  
 141 and the mutation status of *CEBPA*.

142

143

144

145

146

147

148



Supplementary Figure 4

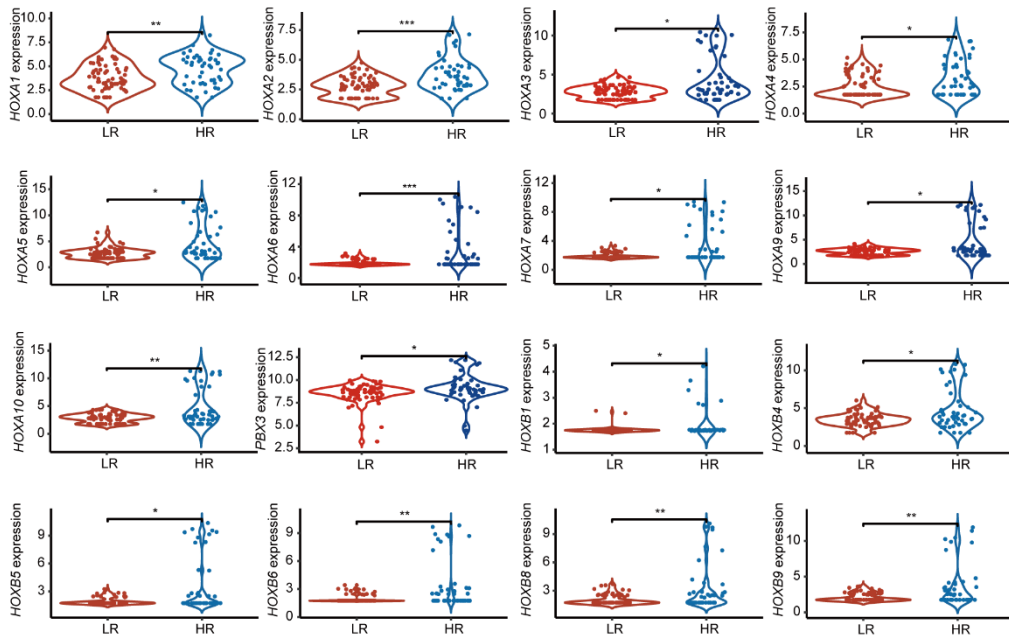

149

150 **Supplementary Figure 4. The expression of *HOXA/B* family genes**  
151 **between the revised risk groups.**

152 LR, the revised low-risk group; HR, the revised high-risk group.

153

154

155

156

157

158

159

160

161

162

Supplementary Figure 5

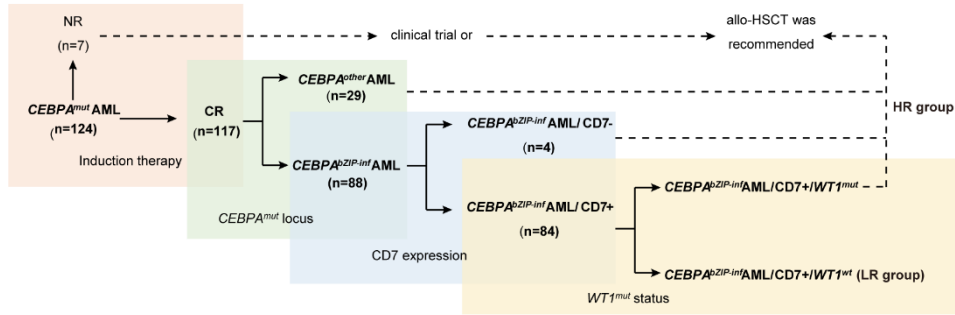

163

164 **Supplementary Figure 5. Scheme of survival analysis in 124 *CEBPA*<sup>mut</sup>**  
 165 **AML patients.**

166

Supplementary Figure 6

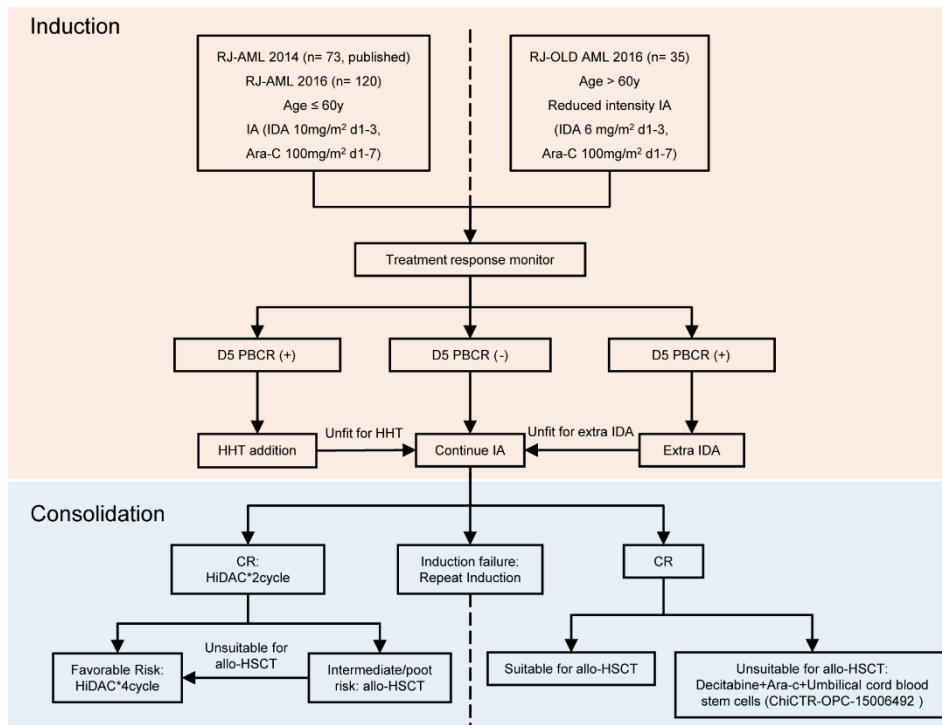

167

168 **Supplementary Figure 6. Treatment protocols of the 293 *CEBPA*<sup>mut</sup> AML**  
 169 **patients enrolled in this study.**

170 IDA, idarubicin; Ara-C, cytarabine; D5 PBCR (-), the day 5 peripheral blast  
 171 clearance rate  $\geq 99.55\%$ . HHT, homoharringtonine.

172

**Supplementary Table1: Clinical and cytogenetic characteristics of *CEBPA*<sup>bZIP-inf</sup> compared with *CEBPA*<sup>other</sup> AML patients.**

| <b>Variable</b>                              | <b><i>CEBPA</i><sup>bZIP-inf</sup><br/>(N=89)</b> | <b><i>CEBPA</i><sup>other</sup><br/>(N=35)</b> | <b>P . value</b> |
|----------------------------------------------|---------------------------------------------------|------------------------------------------------|------------------|
| <b>Gender(n,%)</b>                           |                                                   |                                                |                  |
| <b>Male</b>                                  | 59(66.3%)                                         | 21(60.0%)                                      | 0.537            |
| <b>Female</b>                                | 30(33.7%)                                         | 14(40.0%)                                      |                  |
| <b>Age in years, median (IQR)</b>            | 44 (35-56)                                        | 59 (47-65)                                     | <0.001           |
| <b>WBC (*10<sup>9</sup>/L), median (IQR)</b> | 22 (6.68-73.4)                                    | 5.2 (2.85-21.9)                                | 0.001            |
| <b>Hb (g/L), median (IQR)</b>                | 97 (74.0-112.0)                                   | 80 (68.0-99.0)                                 | 0.041            |
| <b>PLT (*10<sup>9</sup>/L), median (IQR)</b> | 24 (12.0-46.0)                                    | 35 (24.5-70.5)                                 | 0.01             |
| <b>BM(%), median (IQR)</b>                   | 61 (43.0-76.5)                                    | 55 (36.8-75.5)                                 | 0.338            |
| <b>ELN, karyotype (n,%)</b>                  |                                                   |                                                |                  |
| <b>Intermediate</b>                          | 82 (92.1%)                                        | 30 (85.7%)                                     | 0.3166           |
| <b>Adverse</b>                               | 7 (7.9%)                                          | 5 (14.3%)                                      |                  |
| <b>CD7 expression (n,%)</b>                  | 85 (95.5%)                                        | 20 (57.1%)                                     | <0.001           |
| <b>CR at EOI (n,%)</b>                       | 81 (91.0%)                                        | 26 (74.3%)                                     | 0.021            |
| <b>CR1 (n,%)</b>                             | 88 (98.9%)                                        | 29(82.9%)                                      | 0.002            |
| <b>Relapse (n,%)</b>                         | 21 (23.9%)                                        | 9 (31.0%)                                      | 0.818            |

BM, bone marrow; EOI, end of induction; CR1, first complete remission.

**Supplementary Table 2. Multivariable analysis of *CEBPA*<sup>bZIP-inf</sup> with CD7-positive expression as a prognostic marker for OS, EFS and DFS.**

| Variable                                      | Overall survival  |               | Event-free survival |               | Disease-free survival |               |
|-----------------------------------------------|-------------------|---------------|---------------------|---------------|-----------------------|---------------|
|                                               | HR [95%CI]        | <i>p</i> .val | HR [95%CI]          | <i>p</i> .val | HR [95%CI]            | <i>p</i> .val |
| <i>CEBPA</i> <sup>bZIP-inf</sup><br>with CD7+ | 0.16 [0.06, 0.49] | 0.001         | 0.45 [0.21, 0.94]   | 0.034         | 0.39 [0.18, 0.85]     | 0.018         |
| Age                                           | 1.01 [0.97, 1.04] | 0.740         | 1.01 [0.98, 1.03]   | 0.505         | 1.01 [0.98, 1.03]     | 0.644         |
| WBC                                           | 1.21 [0.37, 3.98] | 0.752         | 1.35 [0.63, 2.89]   | 0.442         | 1.32 [0.58, 2.99]     | 0.510         |
| HB                                            | 1.02 [0.99, 1.04] | 0.151         | 1.00 [0.99, 1.01]   | 0.854         | 1.00 [0.99, 1.02]     | 0.790         |
| PLT                                           | 0.99 [0.98, 1.01] | 0.411         | 1.00 [1.00, 1.01]   | 0.249         | 1.01 [1.00, 1.01]     | 0.078         |

**Supplementary Table 3. The distribution of co-mutations within 117 *CEBPA*<sup>mut</sup> AML patients who achieved CR during induction therapy.**

|                                        | Gene            | p      | Total (n=117) |               |    |               | <i>CEBPA</i> <sup>bZIP-inf</sup> /CD7+ (n=84) |               |    |               | other <i>CEBPA</i> <sup>mut</sup> (n=33) |               |    |               | P      |
|----------------------------------------|-----------------|--------|---------------|---------------|----|---------------|-----------------------------------------------|---------------|----|---------------|------------------------------------------|---------------|----|---------------|--------|
|                                        |                 |        | n             | frequency (%) | N  | Frequency (%) | n                                             | frequency (%) | N  | Frequency (%) | n                                        | frequency (%) | N  | Frequency (%) |        |
| Transcriptional Factors                | <i>GATA2</i>    | 0.034  | 22            | 18.8          |    |               | 20                                            | 23.8          |    |               | 2                                        | 6.1           |    |               | 0.027  |
|                                        | <i>IKZF1</i>    | 1      | 10            | 8.5           | 31 | 26.5          | 7                                             | 8.3           | 27 | 32.1          | 3                                        | 9.1           | 4  | 12.1          |        |
|                                        | <i>RUNX1</i>    | 1      | 3             | 2.6           |    |               | 2                                             | 2.4           |    |               | 1                                        | 3             |    |               |        |
| Chromatin/<br>Cohesion/<br>Spliceosome | <i>EZH2</i>     | 0.442  | 9             | 7.7           |    |               | 8                                             | 9.5           |    |               | 1                                        | 3             |    |               | 0.049  |
|                                        | <i>ASXL1</i>    | 0.067  | 4             | 3.4           |    |               | 1                                             | 1.2           |    |               | 3                                        | 9.1           |    |               |        |
|                                        | <i>STATG2</i>   | 0.001  | 5             | 4.3           |    |               | 0                                             | 0             |    |               | 5                                        | 15.2          |    |               |        |
|                                        | <i>BCOR</i>     | 0.006  | 4             | 3.4           |    |               | 0                                             | 0             |    |               | 4                                        | 12.1          |    |               |        |
|                                        | <i>SRSF2</i>    | 0.078  | 2             | 1.7           |    |               | 0                                             | 0             |    |               | 2                                        | 6.1           |    |               |        |
|                                        | <i>ZRSR2</i>    | 0.282  | 1             | 0.9           |    |               | 0                                             | 0             |    |               | 1                                        | 3             |    |               |        |
|                                        | <i>U2AF1</i>    | 0.282  | 1             | 0.9           |    |               | 0                                             | 0             |    |               | 1                                        | 3             |    |               |        |
|                                        | <i>RAD21</i>    | 0.097  | 7             | 6             |    |               | 3                                             | 3.6           |    |               | 4                                        | 12.1          |    |               |        |
|                                        | <i>SMC1A</i>    | 0.135  | 5             | 4.3           | 54 | 46.2          | 2                                             | 2.4           | 34 | 40.5          | 3                                        | 9.1           | 20 | 60.6          |        |
|                                        | <i>BCORL1</i>   | 0.282  | 1             | 0.9           |    |               | 0                                             | 0             |    |               | 1                                        | 3             |    |               |        |
|                                        | <i>SMC3</i>     | 0.558  | 3             | 2.6           |    |               | 3                                             | 3.6           |    |               | 0                                        | 0             |    |               |        |
|                                        | <i>TET2</i>     | 0.271  | 18            | 15.4          |    |               | 11                                            | 13.1          |    |               | 7                                        | 21.2          |    |               |        |
|                                        | <i>DNMT3A</i>   | 1      | 11            | 9.4           |    |               | 8                                             | 9.5           |    |               | 3                                        | 9.1           |    |               |        |
|                                        | <i>IDH2</i>     | <0.001 | 6             | 5.1           |    |               | 0                                             | 0             |    |               | 6                                        | 18.2          |    |               |        |
|                                        | <i>IDH1</i>     | 0.316  | 4             | 3.4           |    |               | 2                                             | 2.4           |    |               | 2                                        | 6.1           |    |               |        |
| <i>DHX15</i>                           | 0.558           | 3      | 2.6           |               |    | 3             | 3.6                                           |               |    | 0             | 0                                        |               |    |               |        |
| <i>EP300</i>                           | 0.182           | 6      | 5.1           |               |    | 6             | 7.1                                           |               |    | 0             | 0                                        |               |    |               |        |
| Receptor Tyrosine Kinases              | <i>CSF3R</i>    | 0.723  | 10            | 8.5           |    |               | 8                                             | 9.5           |    |               | 2                                        | 6.1           |    |               | 0.9404 |
|                                        | <i>NRAS</i>     | 1      | 15            | 12.8          |    |               | 11                                            | 13.1          |    |               | 4                                        | 12.1          |    |               |        |
|                                        | <i>FTL3-ITD</i> | 0.502  | 11            | 9.4           | 49 | 41.9          | 7                                             | 8.3           | 35 | 41.7          | 4                                        | 12.1          | 14 | 42.4          |        |
|                                        | <i>JAK3</i>     | 0.107  | 13            | 11.1          |    |               | 12                                            | 14.3          |    |               | 1                                        | 3             |    |               |        |
|                                        | <i>KIT</i>      | 1      | 7             | 6             |    |               | 5                                             | 6             |    |               | 2                                        | 6.1           |    |               |        |
| <i>PTPN11</i>                          | 0.191           | 3      | 2.6           |               |    | 1             | 1.2                                           |               |    | 2             | 6.1                                      |               |    |               |        |
| Tumor suppressors                      | <i>WT1</i>      | -      | -             | -             | 23 | 19.7          | -                                             | -             | 15 | 17.9          | -                                        | -             | 8  | 24.2          | 0.4342 |
| Nucleolar                              | <i>NPM1</i>     | -      | -             | -             | 7  | 6             | -                                             | -             | 0  | 0             | -                                        | -             | 7  | 21.2          | <0.001 |

p value indicated the difference significance of indicated genes between *CEBPA*<sup>bZIP-inf</sup>/CD7+ and other *CEBPA*<sup>mut</sup> AML cases;

P value indicated the difference significance of indicated gene groups between *CEBPA*<sup>bZIP-inf</sup>/CD7+ and other *CEBPA*<sup>mut</sup> AML cases.

173  
174  
175  
176  
177  
178  
179  
180  
181  
182  
183  
184  
185  
186  
187  
188

**References:**

1. Zhang Y, Li X, Weng X, Shen Y, Chen Y, Zheng Y, et al. Optimization of idarubicin and cytarabine induction regimen with homoharringtonine for newly diagnosed acute myeloid leukemia patients based on the peripheral blast clearance rate: A single-arm, phase 2 trial ( RJ-AML 2014). *American journal of hematology*. 2021;97(1):43-51.
2. Cheng WY, Li JF, Zhu YM, Lin XJ, Wen LJ, Zhang F, et al. Transcriptome-based molecular subtypes and differentiation hierarchies improve the classification framework of acute myeloid leukemia. *Proceedings of the National Academy of Sciences of the United States of America*. 2022;119(49):e2211429119.
3. Liu FJ, Cheng WY, Lin XJ, Wang SY, Jiang TY, Ma TT, et al. Measurable Residual Disease Detected by Multiparameter Flow Cytometry and Sequencing Improves Prediction of Relapse and Survival in Acute Myeloid Leukemia. *Front Oncol*. 2021;11:677833.
4. Alba AC, Agoritsas T, Walsh M, Hanna S, Iorio A, Devereaux PJ, et al. Discrimination and Calibration of Clinical Prediction Models: Users' Guides to the Medical Literature. *Jama*. 2017;318(14):1377-84.
